# Supplementary material for: Incorporation of CuO NPs into modified UiO-66-NH2 metal–organic frameworks (MOFs) with melamine for catalytic C–O coupling in the Ullmann condensation
Source: Royal Society of Chemistry journal article supplement (doi:10.1039/c7nj02114c), 2017-01-01
Supplement: c7nj02114c1.pdf [file c7nj02114c1.pdf]

## Supporting Information

### Incorporation of CuO NPs into the modified UiO-66-NH<sub>2</sub> metal-organic frameworks (MOFs) with melamine for catalytic C–O coupling in the Ullmann condensation

Samira Sadeghi,<sup>1</sup> Mohammad Jafarzadeh,<sup>1\*</sup> Amir Reza Abbasi,<sup>1</sup> Kim Daasbjerg<sup>2,3</sup>

<sup>1</sup>Faculty of Chemistry, Razi University, Kermanshah 67149-67346, Iran

<sup>2</sup>Department of Chemistry, Aarhus University, Langelandsgade 140, 8000 Aarhus C, Denmark

<sup>3</sup>Interdisciplinary Nanoscience Center (iNANO), Aarhus University, Gustav Wieds Vej 14, 8000 Aarhus C, Denmark

\*Corresponding author (M. Jafarzadeh): Email: [mjafarzadeh1027@yahoo.com](mailto:mjafarzadeh1027@yahoo.com)

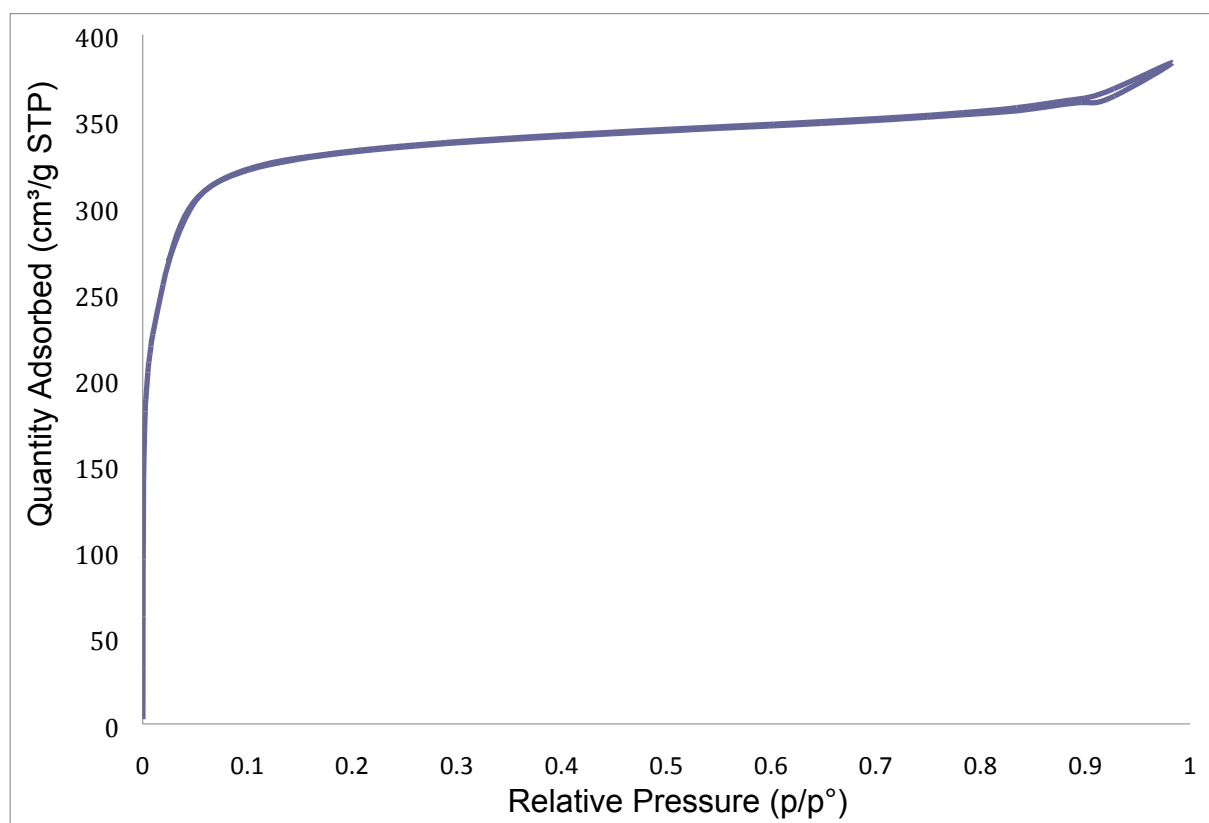

**Figure S1.** N<sub>2</sub> adsorption-desorption isotherm of UiO-66-NH<sub>2</sub>.

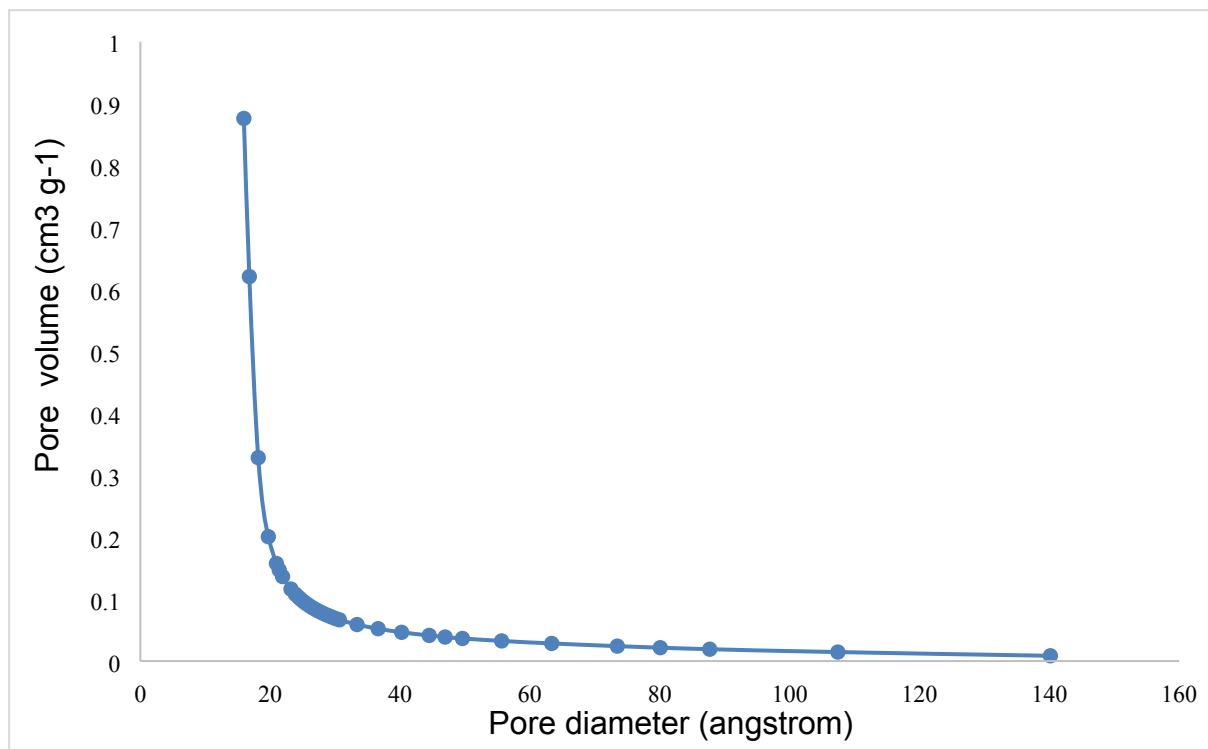

**Figure S2.** Pore volume distribution of UiO-66-NH<sub>2</sub>.

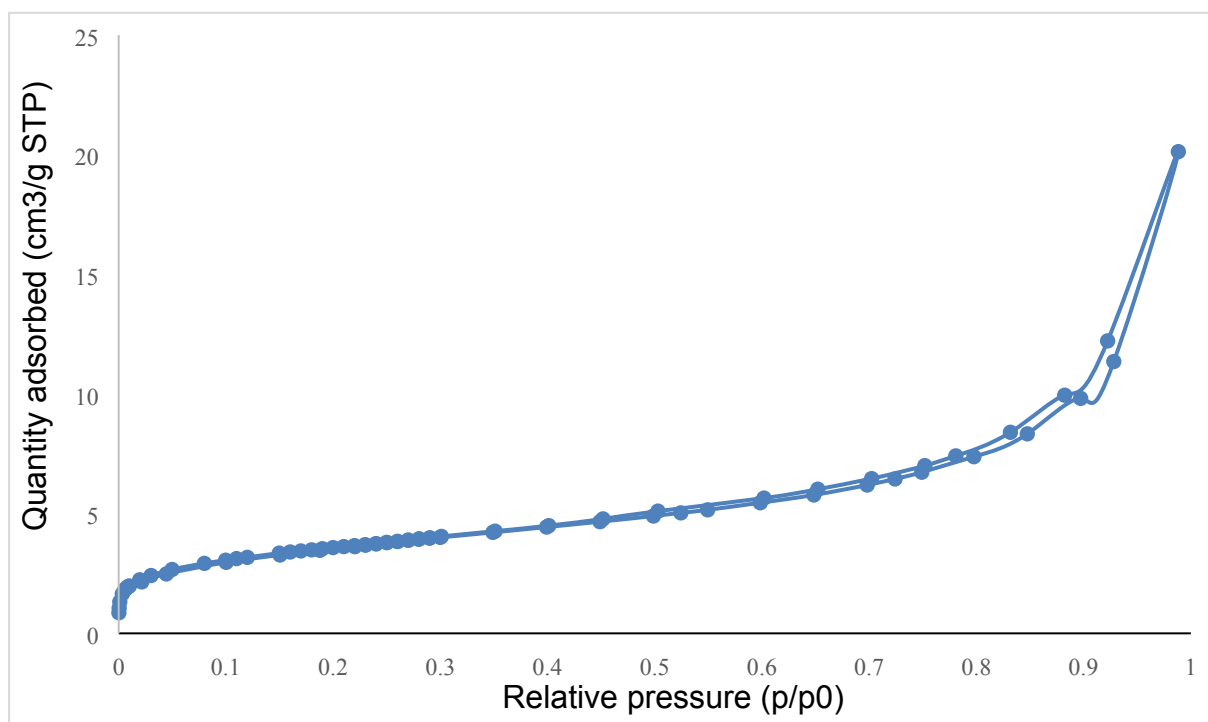

**Figure S3.** N<sub>2</sub> adsorption-desorption isotherm for reused UiO-66-NH<sub>2</sub>-MIm/CuO.

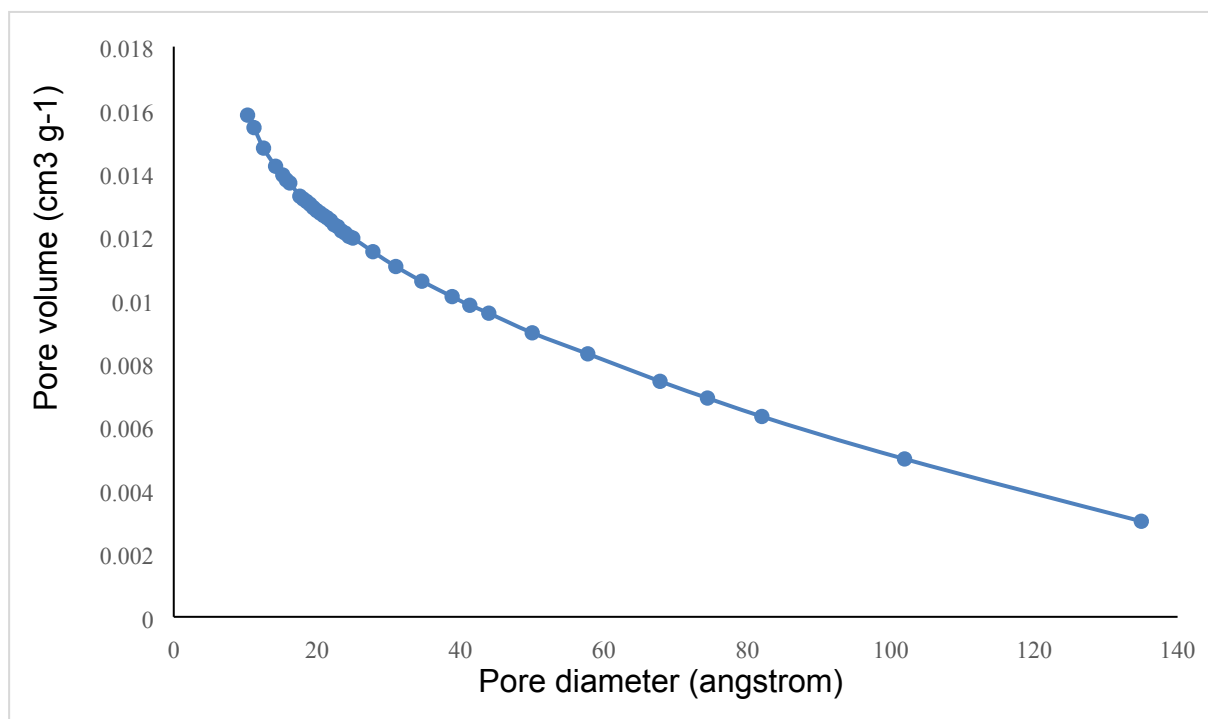

**Figure S4.** Pore volume distribution for reused UiO-66-NH<sub>2</sub>-MIm/CuO.

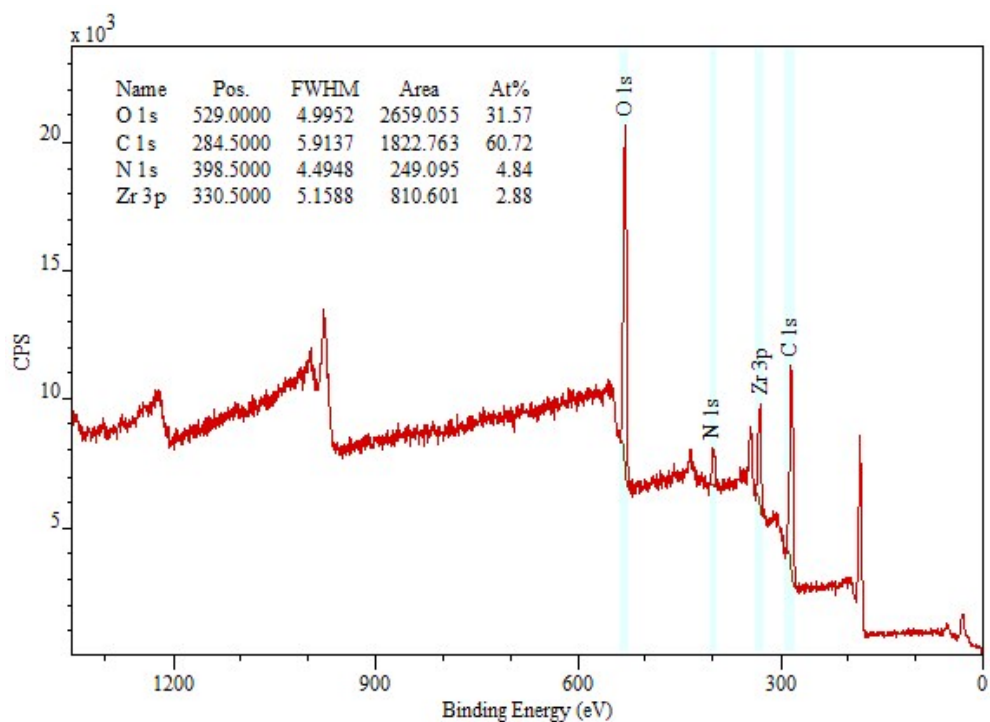

**Figure S5.** XPS survey of UiO-66-NH<sub>2</sub>.

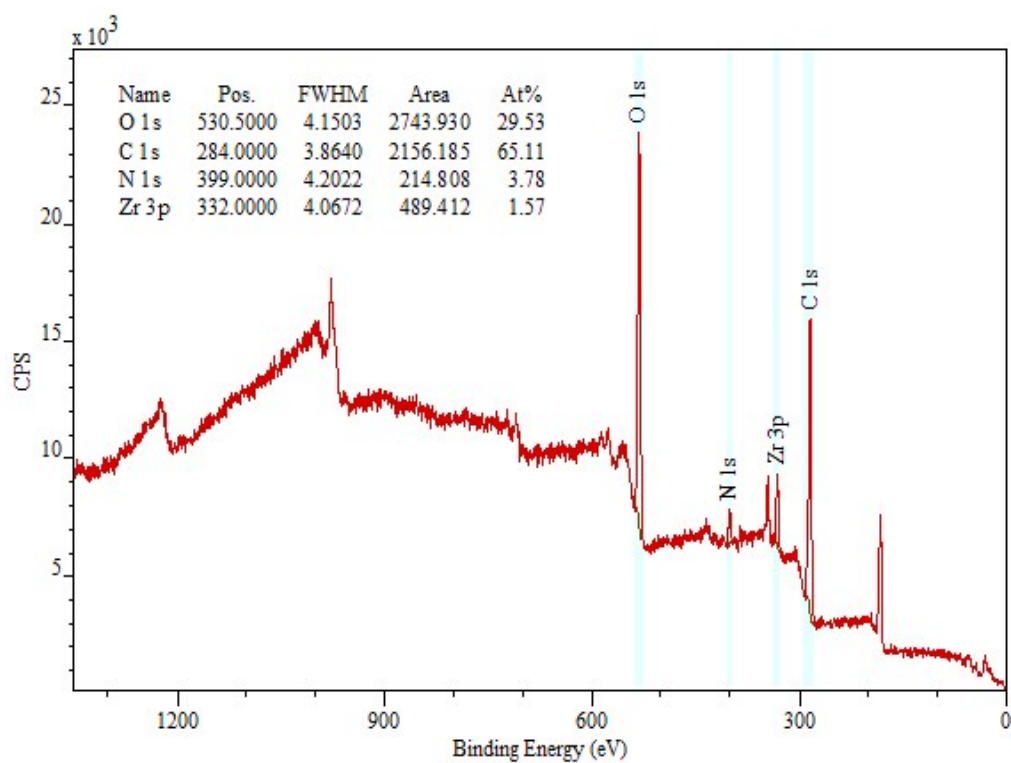

**Figure S6.** XPS survey of UiO-66-NH<sub>2</sub>-Mlm.

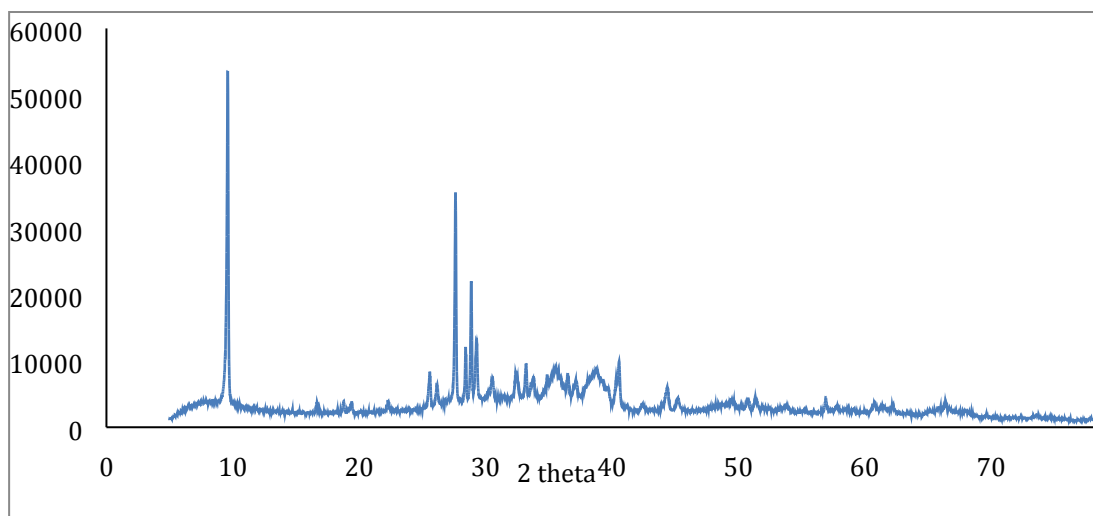

**Figure S7.** XRD patterns of reused UiO-66-NH<sub>2</sub>-Mlm/CuO.

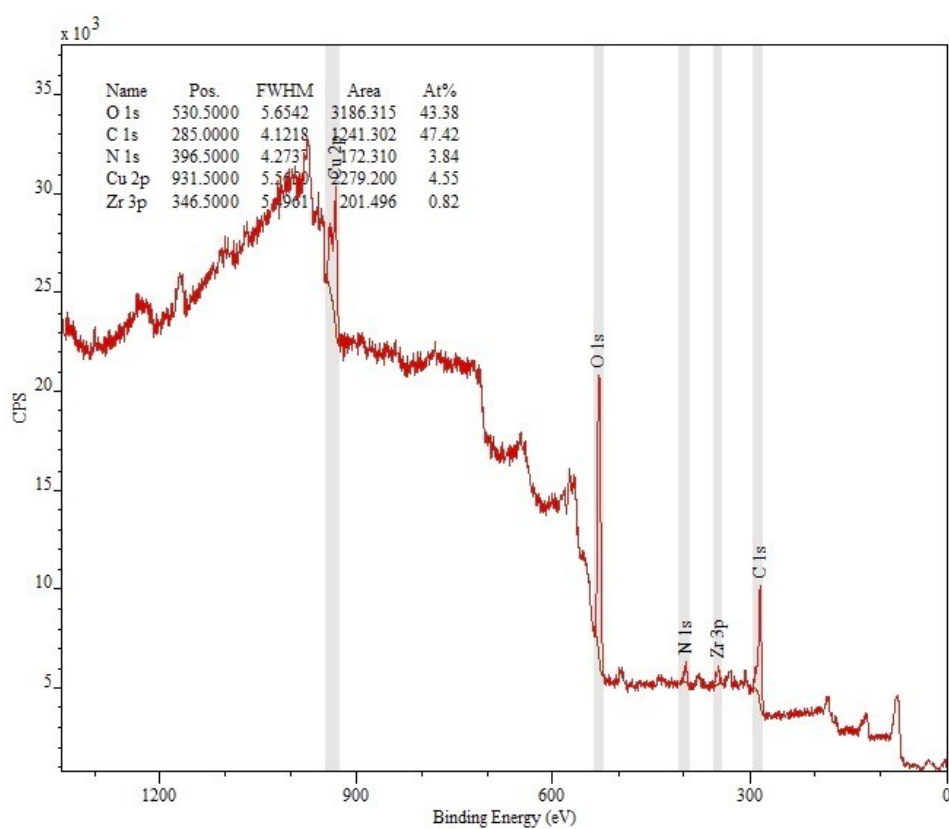

**Figure S8.** XPS survey of reused UiO-66-NH<sub>2</sub>-Mlm/CuO.

**NMR data of the products:**

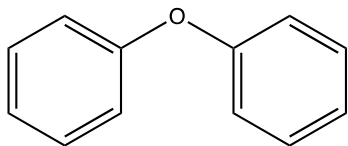

**Oxydibenzene:**  $^1\text{H}$  NMR (400 MHz,  $\text{CDCl}_3$ ):  $\delta = 7.37$  (t, 4 H), 7.14 (t, 2H), 7.05 (d, 4 H).  $^{13}\text{C}$  NMR (100 MHz,  $\text{CDCl}_3$ ):  $\delta = 157.2, 129.7, 123.2, 118.9$ .

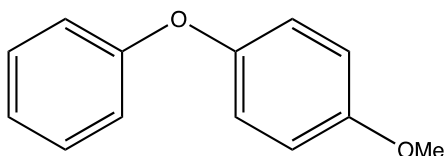

**1-Methoxy-4-phenoxybenzene:**  $^1\text{H}$  NMR (400 MHz,  $\text{CDCl}_3$ ):  $\delta = 7.32$ -7.25 (m, 4 H), 7.11-6.90 (m, 5 H), 3.80 (s, 3 H).  $^{13}\text{C}$  NMR (100 MHz,  $\text{CDCl}_3$ ):  $\delta = 157.2, 155.4, 151.1, 128.5, 121.5, 119.8, 118.8, 114.3, 55.8$ .

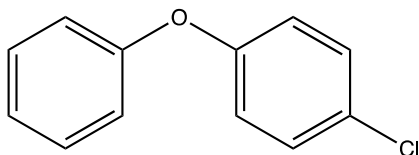

**1-Chloro-4-phenoxybenzene:**  $^1\text{H}$  NMR (400 MHz,  $\text{CDCl}_3$ ):  $\delta = 7.52$ -7.40 (m, 4 H), 7.30-6.99 (m, 5 H).  $^{13}\text{C}$  NMR (100 MHz,  $\text{CDCl}_3$ ):  $\delta = 157.0, 155.5, 129.6, 128.8, 128.2, 122.7, 119.7, 118.9$ .

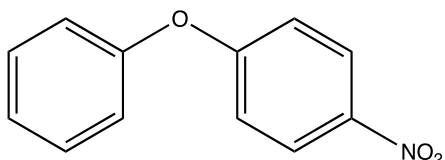

**1-Nitro-4-phenoxybenzene:**  $^1\text{H}$  NMR (400 MHz,  $\text{CDCl}_3$ ):  $\delta = 8.21$ -7.41 (m, 4 H), 7.38-7.06 (m, 5 H).  $^{13}\text{C}$  NMR (100 MHz,  $\text{CDCl}_3$ ):  $\delta = 157.4, 149.8, 138.6, 128.3, 124.4, 122.8, 118.9, 116.5$ .

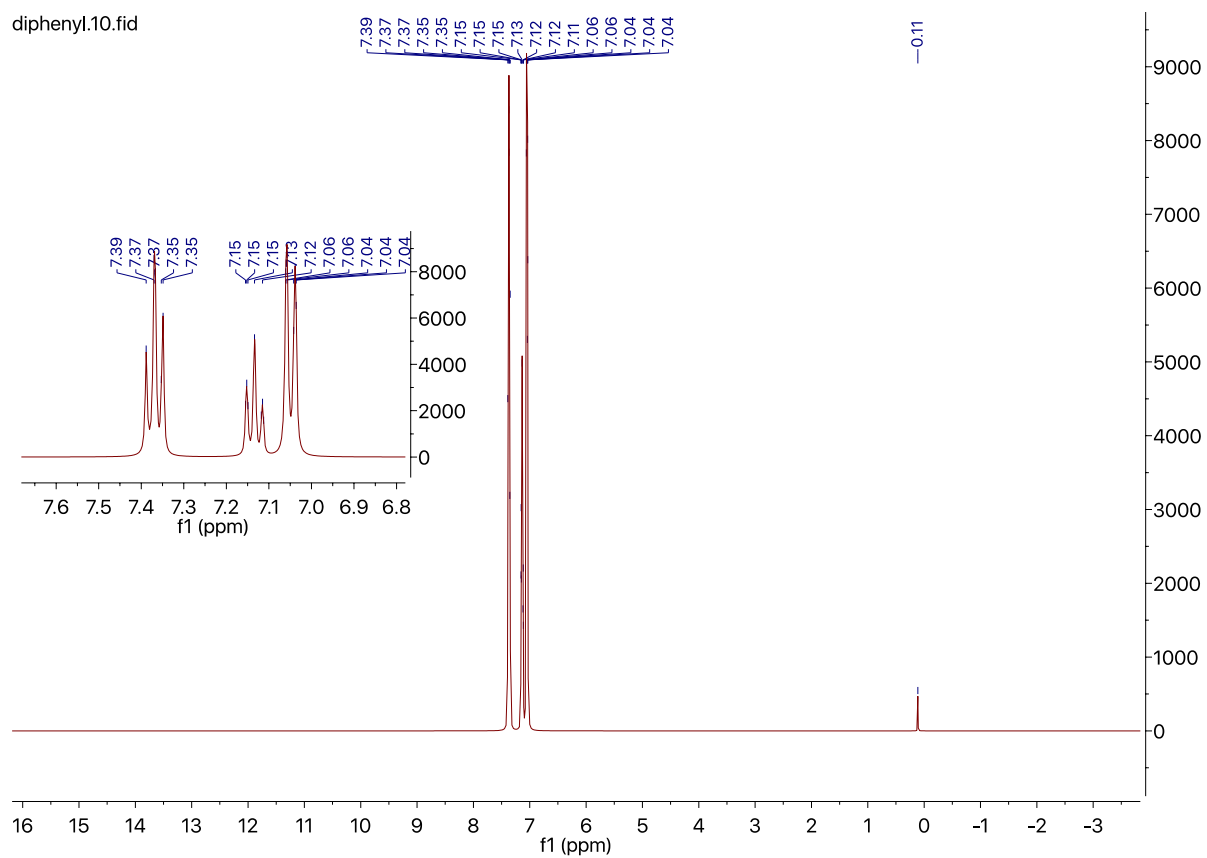

**Figure S9.**  $^1\text{H}$  NMR for the diphenyl ether obtained from the model reaction.

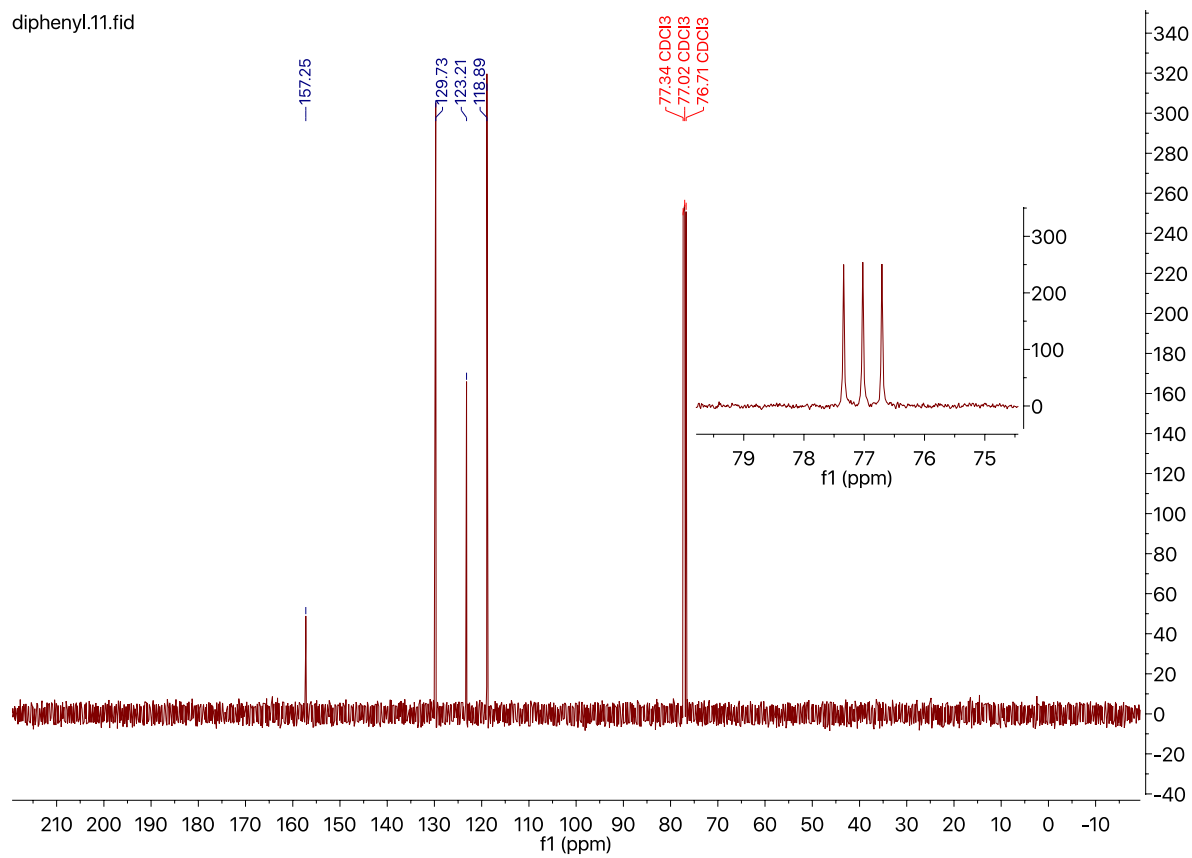

**Figure S10.**  $^{13}\text{C}$  NMR for the diphenyl ether obtained from the model reaction.
